# Supplementary material for: Mechanism of biphasic charge recombination and accumulation in TiO2mesoporous structured perovskite solar cells
Source: Royal Society of Chemistry journal article supplement (doi:10.1039/c6cp01360k), 2016-01-01
Supplement: c6cp01360k1.pdf [file c6cp01360k1.pdf]

# Mechanism of Biphasic Charge Recombination and Accumulation in TiO<sub>2</sub> Mesoporous Structured Perovskite Solar Cells

Hao-Yi Wang,<sup>‡</sup> Yi Wang,<sup>‡</sup> Man Yu, Jun Han, Zhi-Xin Guo,<sup>\*</sup> Xi-Cheng Ai, Jian-Ping Zhang  
and Yujun Qin<sup>\*</sup>

Department of Chemistry, Renmin University of China, Beijing 100872, P. R. China

## Experimental section

First of all, fluorine doped tin oxide glasses (FTO, Pilkington TEC-7, 7 Ω/sq) were pre-patterned by etching with Zn powder and diluted HCl. Then the substrates were successively rinsed with detergent, deionized water, acetone and ethanol using an ultrasonic bath for 15 min, respectively. After drying under compressed N<sub>2</sub>, the substrates were subjected to an ultraviolet plasma treatment for 20 min to get rid of organic residues. A thin compact layer of TiO<sub>2</sub> was deposited on the pre-cleaned FTO plates by spin-coating a titanium diisopropoxide bis(acetylacetonate) solution (75% in isopropyl alcohol (IPA)) diluted in n-butyl alcohol (2:25 v/v) followed by 15 min thermal treatment. Afterwards, a diluted commercial TiO<sub>2</sub> paste was spin-coated on the top of the compact layer. The films were then sintered at 500 °C for 30 min.

The active layer manipulation process is similar with the so-called modified sequential deposition as pre-reported. Briefly, the mesoporous TiO<sub>2</sub> films were

infiltrated by 20  $\mu\text{L}$  of  $\text{PbI}_2$  solution (1 M in DMF) prior to spin-coating at 4000 rpm, then the films were dried at 70  $^\circ\text{C}$ . While cooling to room temperature, 200  $\mu\text{L}$  of methylammonium iodide (MAI) solution in IPA with certain concentrations was dropped on the top of the  $\text{PbI}_2$  film. Then the films were spun at 4000 rpm for 20 s to spread out the excess MAI solution. Thereafter the films were annealed at 100  $^\circ\text{C}$  for 30 min to constitute perovskite crystal. The hole transport material (HTM) was subsequently deposited by spin-coating the precursor solution at 1000 rpm for 5s and 4000 rpm for 20s. The HTM recipe was prepared by dissolving 72.3 mg of 2,2',7,7'-tetrakis(N,N-di-p-methoxyphenylamine)-9,9-spirobifluorene, 28.8  $\mu\text{L}$  of 4-tert-butylpyridine, 17.5  $\mu\text{L}$  of a stock solution of 520 mg/mL lithium bis(trifluoromethylsulphonyl)imide in acetonitrile and 29  $\mu\text{L}$  of a stock solution of 300 mg/mL tris(2-(1H-pyrazol-1-yl)-4-tert-butylpyridine)cobalt(III) bis(trifluoromethylsulphonyl)imide in acetonitrile in 1 mL of chlorobenzene. Finally, 60 nm of Au was thermally evaporated as the electrode. The device fabrication was carried out in an inert glove-box. Herein, three target sample devices fabricated from the different MAI solution concentrations of 8 mg/mL, 12 mg/mL and 14 mg/mL are named Cell-L, Cell-M and Cell-S, respectively, corresponding to the resulting large, middle and small perovskite particle sizes.

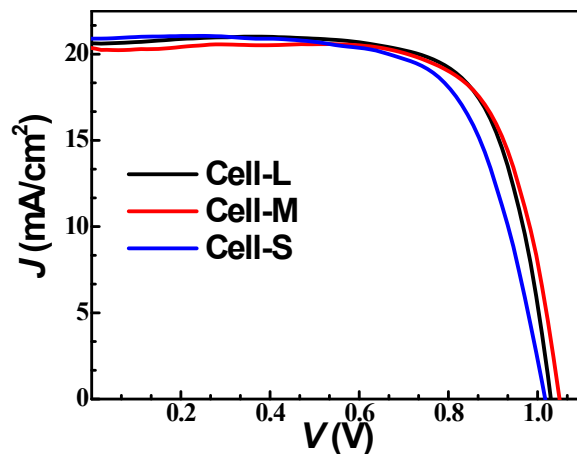

Fig. S1 Sample  $J$ - $V$  curves of relevant devices mostly approaching the average performances.

Table S1 Photovoltaic parameters of relevant devices mostly approaching the average performances

|        | $J_{sc}$ (mA/cm <sup>2</sup> ) | $V_{oc}$ (V) | FF   | PCE (%) |
|--------|--------------------------------|--------------|------|---------|
| Cell-L | 20.62                          | 1.030        | 0.73 | 15.46   |
| Cell-M | 20.35                          | 1.049        | 0.72 | 15.37   |
| Cell-S | 20.89                          | 1.017        | 0.68 | 14.52   |

Table S2 Photovoltaic performance parameters for statistical analysis of device named Cell-L

| Sample No.<br>(Cell-L) | $J_{sc}$ (mA/cm <sup>2</sup> ) | $V_{oc}$ (V) | FF          | PCE (%)      |
|------------------------|--------------------------------|--------------|-------------|--------------|
| 1                      | 21.90                          | 1.073        | 0.75        | 17.57        |
| 2                      | 21.81                          | 1.042        | 0.74        | 16.96        |
| 3                      | 21.58                          | 1.026        | 0.75        | 16.55        |
| 4                      | 21.48                          | 1.029        | 0.72        | 16.01        |
| 5                      | 20.61                          | 1.045        | 0.74        | 15.89        |
| 6                      | 20.51                          | 1.067        | 0.72        | 15.88        |
| 7                      | 21.83                          | 1.031        | 0.70        | 15.84        |
| 8                      | 21.57                          | 1.073        | 0.68        | 15.80        |
| 9                      | 20.62                          | 1.030        | 0.73        | 15.46        |
| 10                     | 20.08                          | 1.002        | 0.74        | 14.87        |
| 11                     | 21.08                          | 1.004        | 0.69        | 14.73        |
| 12                     | 21.07                          | 1.034        | 0.67        | 14.64        |
| 13                     | 19.92                          | 0.985        | 0.74        | 14.50        |
| 14                     | 21.16                          | 1.028        | 0.65        | 14.22        |
| 15                     | 20.47                          | 0.977        | 0.66        | 13.24        |
| <b>Mean</b>            | <b>21.05</b>                   | <b>1.030</b> | <b>0.71</b> | <b>15.48</b> |
| <b>STDEV</b>           | <b>0.65</b>                    | <b>0.029</b> | <b>0.03</b> | <b>1.13</b>  |

Table S3 Photovoltaic performance parameters for statistical analysis of device named Cell-M

| Sample No.<br>(Cell-M) | $J_{sc}$<br>(mA/cm <sup>2</sup> ) | $V_{oc}$ (V) | FF          | PCE (%)      |
|------------------------|-----------------------------------|--------------|-------------|--------------|
| 1                      | 21.45                             | 1.031        | 0.72        | 15.90        |
| 2                      | 20.49                             | 1.068        | 0.73        | 15.89        |
| 3                      | 20.10                             | 1.069        | 0.74        | 15.83        |
| 4                      | 21.23                             | 1.044        | 0.71        | 15.65        |
| 5                      | 19.94                             | 1.071        | 0.73        | 15.60        |
| 6                      | 20.11                             | 1.074        | 0.72        | 15.53        |
| 7                      | 20.30                             | 1.062        | 0.72        | 15.48        |
| 8                      | 20.35                             | 1.049        | 0.72        | 15.37        |
| 9                      | 20.12                             | 1.041        | 0.73        | 15.33        |
| 10                     | 19.81                             | 1.048        | 0.73        | 15.23        |
| 11                     | 19.78                             | 1.033        | 0.74        | 15.09        |
| 12                     | 19.75                             | 1.047        | 0.73        | 15.07        |
| 13                     | 20.39                             | 1.036        | 0.71        | 14.93        |
| 14                     | 20.65                             | 1.051        | 0.69        | 14.92        |
| 15                     | 19.41                             | 1.053        | 0.73        | 14.86        |
| <b>Mean</b>            | <b>20.26</b>                      | <b>1.052</b> | <b>0.72</b> | <b>15.38</b> |
| <b>STDEV</b>           | <b>0.55</b>                       | <b>0.014</b> | <b>0.01</b> | <b>0.36</b>  |

Table S4 Photovoltaic performance parameters for statistical analysis of device named Cell-S

| Sample No.<br>(Cell-S) | $J_{sc}$ (mA/cm <sup>2</sup> ) | $V_{oc}$ (V) | FF          | PCE (%)      |
|------------------------|--------------------------------|--------------|-------------|--------------|
| 1                      | 21.23                          | 1.025        | 0.72        | 15.58        |
| 2                      | 21.28                          | 1.023        | 0.70        | 15.26        |
| 3                      | 19.90                          | 1.027        | 0.74        | 15.19        |
| 4                      | 20.00                          | 1.042        | 0.73        | 15.16        |
| 5                      | 19.61                          | 1.056        | 0.73        | 15.15        |
| 6                      | 20.89                          | 1.017        | 0.68        | 14.52        |
| 7                      | 19.66                          | 1.028        | 0.70        | 14.15        |
| 8                      | 19.43                          | 1.036        | 0.70        | 13.99        |
| 9                      | 20.64                          | 1.041        | 0.65        | 13.89        |
| 10                     | 20.16                          | 0.985        | 0.65        | 12.85        |
| <b>Mean</b>            | <b>20.28</b>                   | <b>1.028</b> | <b>0.70</b> | <b>14.57</b> |
| <b>STDEV</b>           | <b>0.68</b>                    | <b>0.019</b> | <b>0.03</b> | <b>0.85</b>  |

Table S5 Parameters of bi-exponential fitting for TPV decay trace (Cell-L)

| $V_{ph}$ (mV) | $V_{base}$ | $A_1$ | $\tau_1$ (s) | $A_2$ | $\tau_2$ (s) | $\tau_n$ (s) |
|---------------|------------|-------|--------------|-------|--------------|--------------|
| 56            | 0.04       | 0.693 | 6.86E-03     | 0.443 | 3.00E-03     | 5.35E-03     |
| 79            | 0.04       | 0.616 | 3.30E-03     | 0.464 | 2.44E-03     | 2.93E-03     |
| 104           | 0.04       | 0.626 | 3.63E-03     | 0.449 | 2.49E-03     | 3.15E-03     |
| 124           | 0.05       | 0.734 | 7.88E-04     | 0.231 | 6.30E-03     | 2.11E-03     |
| 149           | 0.05       | 0.780 | 1.16E-03     | 0.244 | 8.23E-03     | 2.85E-03     |
| 175           | 0.05       | 0.714 | 3.90E-03     | 0.401 | 2.99E-03     | 3.57E-03     |
| 196           | 0.05       | 0.680 | 4.71E-03     | 0.412 | 3.10E-03     | 4.10E-03     |
| 225           | 0.04       | 0.567 | 2.31E-03     | 0.417 | 2.25E-03     | 2.28E-03     |
| 248           | 0.05       | 0.729 | 1.10E-03     | 0.297 | 7.05E-03     | 2.82E-03     |
| 281           | 0.04       | 0.816 | 9.28E-04     | 0.224 | 6.97E-03     | 2.23E-03     |
| 298           | 0.05       | 0.784 | 7.96E-04     | 0.231 | 6.65E-03     | 2.13E-03     |
| 318           | 0.05       | 0.798 | 1.09E-03     | 0.240 | 7.92E-03     | 2.67E-03     |
| 348           | 0.04       | 0.811 | 9.59E-04     | 0.216 | 7.99E-03     | 2.44E-03     |
| 387           | 0.04       | 0.795 | 7.37E-04     | 0.218 | 6.27E-03     | 1.93E-03     |
| 407           | 0.04       | 0.835 | 8.44E-04     | 0.200 | 7.86E-03     | 2.20E-03     |
| 426           | 0.05       | 0.792 | 8.47E-04     | 0.236 | 6.56E-03     | 2.16E-03     |
| 449           | 0.03       | 0.867 | 6.27E-04     | 0.244 | 4.94E-03     | 1.57E-03     |
| 467           | 0.03       | 0.827 | 6.15E-04     | 0.193 | 4.84E-03     | 1.41E-03     |
| 498           | 0.03       | 0.766 | 5.07E-04     | 0.216 | 4.87E-03     | 1.47E-03     |
| 523           | 0.03       | 0.814 | 4.41E-04     | 0.206 | 4.61E-03     | 1.28E-03     |
| 545           | 0.04       | 0.805 | 5.70E-04     | 0.243 | 6.52E-03     | 1.95E-03     |
| 576           | 0.03       | 0.748 | 9.28E-04     | 0.289 | 1.05E-03     | 9.62E-04     |
| 606           | 0.03       | 0.702 | 8.07E-04     | 0.388 | 5.69E-04     | 7.22E-04     |
| 622           | 0.03       | 0.754 | 6.74E-04     | 0.328 | 6.13E-04     | 6.56E-04     |
| 652           | 0.03       | 0.763 | 8.39E-04     | 0.301 | 8.42E-04     | 8.40E-04     |
| 681           | 0.03       | 0.804 | 8.18E-04     | 0.266 | 9.26E-04     | 8.45E-04     |
| 705           | 0.02       | 0.749 | 6.64E-04     | 0.338 | 4.84E-04     | 6.08E-04     |
| 726           | 0.02       | 0.796 | 4.70E-04     | 0.305 | 6.66E-04     | 5.24E-04     |
| 751           | 0.02       | 0.828 | 4.04E-04     | 0.292 | 5.69E-04     | 4.47E-04     |
| 781           | 0.02       | 0.841 | 3.83E-04     | 0.295 | 5.23E-04     | 4.20E-04     |
| 805           | 0.02       | 0.639 | 1.88E-04     | 0.389 | 1.45E-04     | 1.71E-04     |
| 828           | 0.02       | 0.731 | 1.71E-04     | 0.322 | 1.84E-04     | 1.75E-04     |
| 849           | 0.01       | 0.692 | 1.05E-04     | 0.365 | 1.18E-04     | 1.09E-04     |
| 882           | 0.01       | 0.759 | 4.99E-05     | 0.335 | 9.36E-06     | 3.75E-05     |
| 909           | 0.02       | 0.616 | 5.03E-05     | 0.458 | 1.14E-05     | 3.37E-05     |

Table S6 Parameters of bi-exponential fitting for TPV decay trace (Cell-M)

| $V_{ph}$ (mV) | $V_{base}$ | $A_1$ | $\tau_1$ (s) | $A_2$ | $\tau_2$ (s) | $\tau_n$ (s) |
|---------------|------------|-------|--------------|-------|--------------|--------------|
| 53            | 0.02       | 0.975 | 1.33E-03     | 0.111 | 1.25E-02     | 2.48E-03     |
| 74            | 0.03       | 0.943 | 1.33E-03     | 0.117 | 9.38E-03     | 2.22E-03     |
| 101           | 0.02       | 1.009 | 1.53E-03     | 0.086 | 1.94E-02     | 2.93E-03     |
| 129           | 0.03       | 0.788 | 8.26E-04     | 0.287 | 3.74E-03     | 1.60E-03     |
| 149           | 0.03       | 0.828 | 7.95E-04     | 0.239 | 3.93E-03     | 1.50E-03     |
| 171           | 0.03       | 0.839 | 7.28E-04     | 0.242 | 3.66E-03     | 1.38E-03     |
| 196           | 0.03       | 0.851 | 9.69E-04     | 0.226 | 4.31E-03     | 1.67E-03     |
| 225           | 0.03       | 0.895 | 7.15E-04     | 0.198 | 4.30E-03     | 1.36E-03     |
| 251           | 0.03       | 0.744 | 6.73E-04     | 0.359 | 2.87E-03     | 1.39E-03     |
| 279           | 0.04       | 0.764 | 4.62E-04     | 0.389 | 2.42E-03     | 1.12E-03     |
| 294           | 0.03       | 0.890 | 6.51E-04     | 0.214 | 3.61E-03     | 1.23E-03     |
| 328           | 0.03       | 0.797 | 5.51E-04     | 0.223 | 2.41E-03     | 9.58E-04     |
| 359           | 0.05       | 0.808 | 5.39E-04     | 0.339 | 2.41E-03     | 1.09E-03     |
| 380           | 0.04       | 0.730 | 5.33E-04     | 0.380 | 2.14E-03     | 1.08E-03     |
| 396           | 0.04       | 0.779 | 6.30E-04     | 0.267 | 2.58E-03     | 1.13E-03     |
| 419           | 0.04       | 0.900 | 7.38E-04     | 0.228 | 3.28E-03     | 1.25E-03     |
| 439           | 0.03       | 0.702 | 5.78E-04     | 0.293 | 2.47E-03     | 1.14E-03     |
| 480           | 0.03       | 0.654 | 3.35E-04     | 0.356 | 1.66E-03     | 8.02E-04     |
| 507           | 0.03       | 0.746 | 5.16E-04     | 0.299 | 2.25E-03     | 1.01E-03     |
| 532           | 0.02       | 0.636 | 4.27E-04     | 0.346 | 1.77E-03     | 9.00E-04     |
| 550           | 0.03       | 0.738 | 4.02E-04     | 0.299 | 2.02E-03     | 8.69E-04     |
| 575           | 0.03       | 0.769 | 5.04E-04     | 0.273 | 2.23E-03     | 9.55E-04     |
| 600           | 0.02       | 0.747 | 6.73E-04     | 0.289 | 1.82E-03     | 9.93E-04     |
| 624           | 0.02       | 0.659 | 1.17E-03     | 0.406 | 5.15E-04     | 9.23E-04     |
| 656           | 0.02       | 0.631 | 1.05E-03     | 0.412 | 1.52E-04     | 6.95E-04     |
| 677           | 0.02       | 0.698 | 6.50E-04     | 0.370 | 9.53E-04     | 7.55E-04     |
| 700           | 0.02       | 1.012 | 3.66E-04     | 0.248 | 1.92E-03     | 6.72E-04     |
| 723           | 0.02       | 0.800 | 8.00E-04     | 0.461 | 3.68E-04     | 6.42E-04     |
| 752           | 0.02       | 0.976 | 4.32E-04     | 0.133 | 2.07E-03     | 6.29E-04     |
| 778           | 0.01       | 1.168 | 3.85E-04     | 0.185 | 1.03E-03     | 4.73E-04     |
| 799           | 0.01       | 0.596 | 6.07E-04     | 0.428 | 2.63E-04     | 4.63E-04     |
| 823           | 0.01       | 0.834 | 3.57E-04     | 0.155 | 4.04E-04     | 3.64E-04     |
| 849           | 0.02       | 0.892 | 1.73E-04     | 0.111 | 1.13E-03     | 2.79E-04     |
| 874           | 0.01       | 0.881 | 1.16E-04     | 0.117 | 5.77E-04     | 1.70E-04     |
| 900           | 0.01       | 0.926 | 1.00E-04     | 0.108 | 5.38E-04     | 1.46E-04     |

Table S7 Parameters of bi-exponential fitting for TPV decay trace (Cell-S)

| $V_{ph}$ (mV) | $V_{base}$ | $A_1$ | $\tau_1$ (s) | $A_2$ | $\tau_2$ (s) | $\tau_n$ (s) |
|---------------|------------|-------|--------------|-------|--------------|--------------|
| 26            | 0.01       | 0.787 | 8.17E-04     | 0.295 | 5.06E-03     | 1.98E-03     |
| 52            | 0.01       | 0.799 | 6.83E-04     | 0.231 | 3.88E-03     | 1.40E-03     |
| 73            | 0.02       | 0.729 | 7.28E-04     | 0.286 | 4.39E-03     | 1.76E-03     |
| 100           | 0.02       | 0.758 | 4.92E-04     | 0.246 | 4.04E-03     | 1.36E-03     |
| 120           | 0.03       | 0.691 | 4.24E-04     | 0.276 | 3.30E-03     | 1.24E-03     |
| 147           | 0.03       | 0.720 | 5.09E-04     | 0.252 | 4.23E-03     | 1.48E-03     |
| 181           | 0.03       | 0.744 | 4.66E-04     | 0.254 | 3.72E-03     | 1.29E-03     |
| 200           | 0.03       | 0.743 | 7.73E-04     | 0.276 | 5.09E-03     | 1.94E-03     |
| 231           | 0.03       | 0.726 | 4.12E-04     | 0.300 | 3.67E-03     | 1.36E-03     |
| 245           | 0.03       | 0.707 | 3.08E-04     | 0.294 | 3.26E-03     | 1.18E-03     |
| 263           | 0.03       | 0.722 | 3.86E-04     | 0.266 | 3.52E-03     | 1.23E-03     |
| 295           | 0.04       | 0.662 | 5.58E-04     | 0.333 | 4.30E-03     | 1.81E-03     |
| 330           | 0.03       | 0.735 | 3.46E-04     | 0.271 | 3.53E-03     | 1.20E-03     |
| 351           | 0.03       | 0.721 | 4.59E-04     | 0.294 | 3.86E-03     | 1.44E-03     |
| 379           | 0.03       | 0.735 | 4.88E-04     | 0.286 | 3.99E-03     | 1.47E-03     |
| 393           | 0.03       | 0.709 | 4.95E-04     | 0.347 | 3.48E-03     | 1.48E-03     |
| 422           | 0.03       | 0.732 | 7.23E-04     | 0.291 | 4.47E-03     | 1.79E-03     |
| 453           | 0.02       | 0.745 | 3.48E-04     | 0.298 | 2.48E-03     | 9.58E-04     |
| 469           | 0.03       | 0.706 | 4.64E-04     | 0.310 | 3.12E-03     | 1.27E-03     |
| 501           | 0.03       | 0.764 | 4.80E-04     | 0.277 | 2.96E-03     | 1.14E-03     |
| 528           | 0.03       | 0.745 | 2.64E-04     | 0.317 | 2.17E-03     | 8.33E-04     |
| 549           | 0.03       | 0.669 | 2.54E-04     | 0.327 | 2.04E-03     | 8.41E-04     |
| 585           | 0.03       | 0.680 | 2.52E-04     | 0.329 | 2.01E-03     | 8.25E-04     |
| 599           | 0.02       | 0.648 | 2.33E-04     | 0.342 | 1.73E-03     | 7.50E-04     |
| 615           | 0.02       | 0.684 | 2.31E-04     | 0.321 | 1.68E-03     | 6.94E-04     |
| 645           | 0.02       | 0.700 | 1.71E-04     | 0.313 | 1.40E-03     | 5.51E-04     |
| 671           | 0.02       | 0.695 | 2.22E-04     | 0.320 | 1.43E-03     | 6.03E-04     |
| 696           | 0.02       | 0.759 | 1.93E-04     | 0.273 | 1.38E-03     | 5.07E-04     |
| 717           | 0.02       | 0.783 | 2.84E-04     | 0.257 | 1.74E-03     | 6.44E-04     |
| 754           | 0.02       | 0.793 | 2.11E-04     | 0.261 | 1.16E-03     | 4.46E-04     |
| 774           | 0.02       | 0.731 | 1.83E-04     | 0.324 | 9.81E-04     | 4.28E-04     |
| 798           | 0.01       | 0.745 | 1.21E-04     | 0.297 | 7.13E-04     | 2.90E-04     |
| 821           | 0.01       | 0.734 | 1.37E-04     | 0.303 | 6.82E-04     | 2.96E-04     |
| 853           | 0.01       | 0.764 | 7.57E-05     | 0.288 | 4.74E-04     | 1.85E-04     |
| 878           | 0.01       | 0.628 | 3.81E-05     | 0.353 | 2.43E-04     | 1.12E-04     |
| 904           | 0.01       | 0.699 | 3.93E-05     | 0.318 | 2.47E-04     | 1.04E-04     |
| 934           | 0.01       | 0.707 | 2.51E-05     | 0.312 | 1.55E-04     | 6.50E-05     |
| 951           | 0.01       | 0.710 | 1.87E-05     | 0.314 | 1.17E-04     | 4.90E-05     |
| 975           | 0.01       | 0.764 | 1.46E-05     | 0.289 | 8.69E-05     | 3.45E-05     |
| 999           | 0.00       | 0.865 | 1.22E-05     | 0.228 | 7.53E-05     | 2.53E-05     |



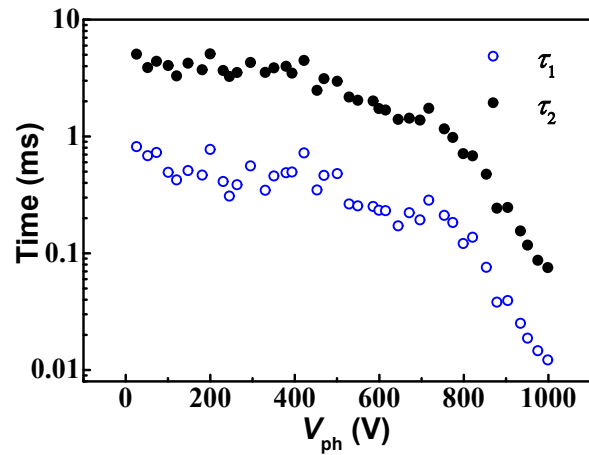

Fig. S2 Fitting parameters  $\tau_1$  and  $\tau_2$  of Cell-S, which show similar dependency on  $V_{ph}$ .

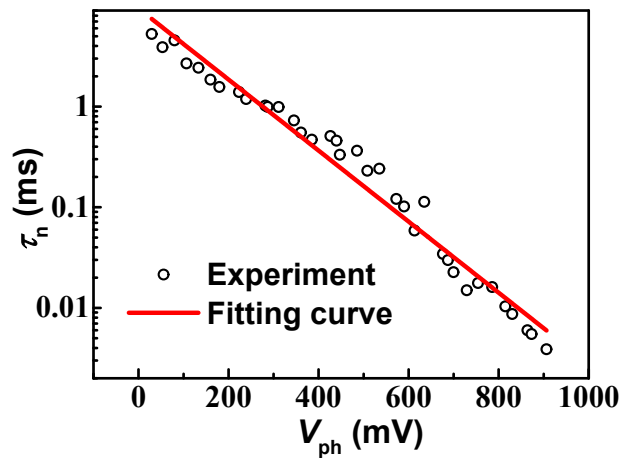

Fig. S3 Charge carrier lifetimes extracted from TPV measurement of planar configuration device without mesoporous  $\text{TiO}_2$ .

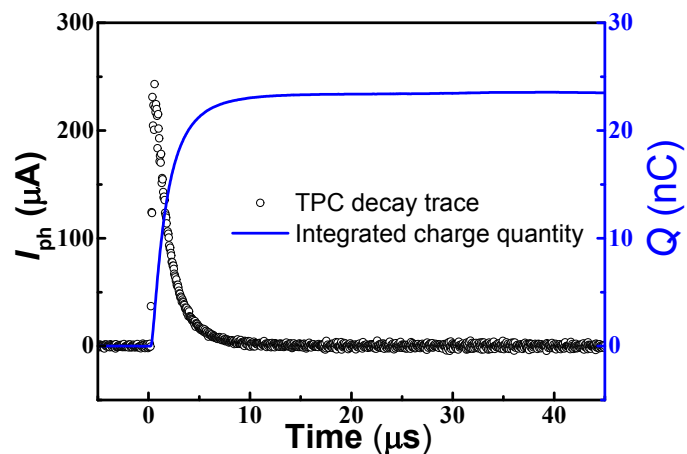

Fig. S4 Sample TPC decay trace and integrated charge amount.

Transient photocurrent measurement was conducted for calculation of capacitance parameters. It was recorded by immediately switching the oscilloscope

input impedance to  $50 \Omega$  after TPV data were recorded.

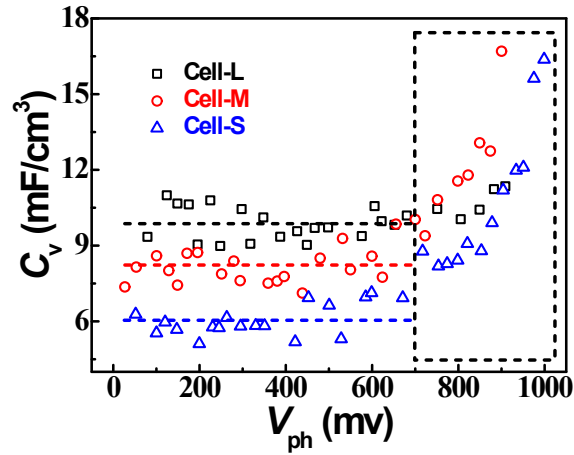

Fig. S5 Calibrated efficient capacitance in unit volume.

The efficient capacitance in unit volume ( $C_v$ ) is calibrated following the equation below to eliminate the effect of film thickness and porosity.

$$C_v = \frac{\Delta Q}{ds(1-p)\Delta V}$$

$\Delta Q$  is extracted by integration of the intrinsic TPC signal (Fig. S3 shows example TPC trace and integration result) and  $\Delta V$  is the amplitude of relative TPV signal,  $d$  is the average film thickness of perovskite/meso-TiO<sub>2</sub> layer obtained from cross-section SEM images,  $p$  is the volume porosity acquired by gray analysis of the top-view SEM images,<sup>1</sup> and the active area  $s$  is set to be 0.1 cm<sup>2</sup>.

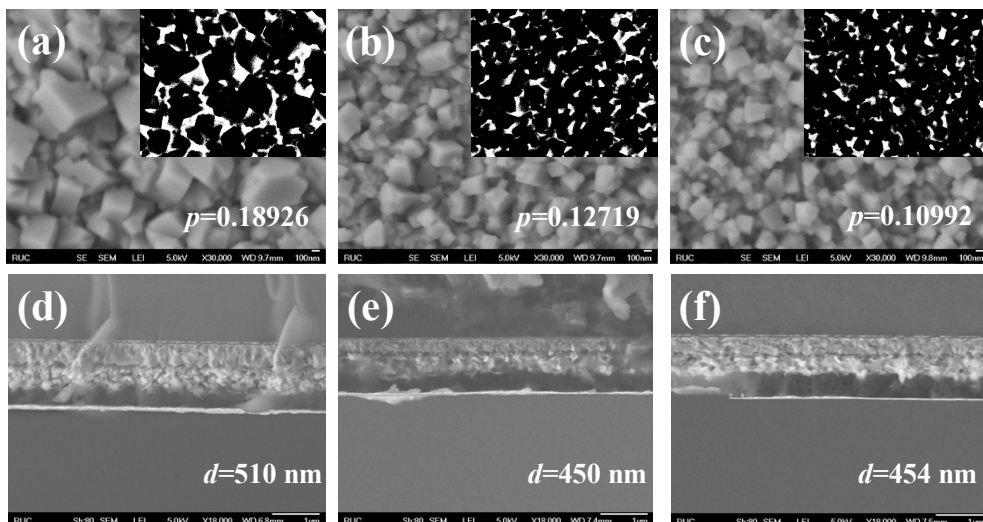

Fig. S6 Top-view and cross-section SEM images of relevant devices. Insets show the gray analysis examples. (a) (d), (b) (e) and (c) (f) corresponds to Cell-L, Cell-M and Cell-S.

## Reference

(1) Okabe, H.; Blunt, M. J., *Phys. Rev. E*, 2004, **70**, 066135.
